# Supplementary material for: Endocannabinoids in Caenorhabditis elegans are essential for the mobilization of cholesterol from internal reserves
Source: PubMed Central journal article supplement (PMC5913221; doi:10.1038/s41598-018-24925-8), 2018-04-23
Supplement: 41598_2018_24925_MOESM1_ESM.pdf [file 41598_2018_24925_MOESM1_ESM.pdf]

1 Endocannabinoids in *Caenorhabditis elegans* are essential for the  
2 mobilization of cholesterol from internal reserves

3

4 **Galles, Celina<sup>a#</sup>, Prez, Gastón M.<sup>a#</sup>, Penkov, Sider<sup>b#</sup>, Boland, Sebastian<sup>c</sup>, Porta, Exequiel O.**  
5 **J.<sup>d</sup>, Altabe, Silvia G.<sup>a</sup>, Labadie, Guillermo R.<sup>c</sup>, Schmidt, Ulrike<sup>e</sup>, Knölker, Hans-Joachim<sup>e</sup>,**  
6 **Kurzchalia, Teymuraz V.<sup>b\*</sup> and de Mendoza, Diego<sup>a\*</sup>**

7

8 <sup>a</sup>Laboratorio de Fisiología Microbiana, Instituto de Biología Molecular y Celular de Rosario (IBR),  
9 CONICET, Facultad de Ciencias Bioquímicas y Farmacéuticas, Universidad Nacional de Rosario,  
10 2000, Rosario, Argentina.

11 <sup>b</sup>Max Planck Institute of Molecular Cell Biology and Genetics, 01307 Dresden, Germany.

12 <sup>c</sup>Department of Genetics and Complex Diseases, Harvard T.H. Chan School of Public Health,  
13 Boston, MA 02115, U.S.A.

14 <sup>d</sup>Instituto de Química Rosario (IQUIR), CONICET, Facultad de Ciencias Bioquímicas y  
15 Farmacéuticas, Universidad Nacional de Rosario 2000, Rosario, Argentina.

16 <sup>e</sup>Department Chemie, Technische Universität Dresden, Bergstr. 66, 01069 Dresden, Germany.

17

18 <sup>#</sup>These authors contributed equally to this work

19 <sup>\*</sup>For correspondence: demendoza@ibr-conicet.gov.ar or kurzchalia@mpi-cbg.de

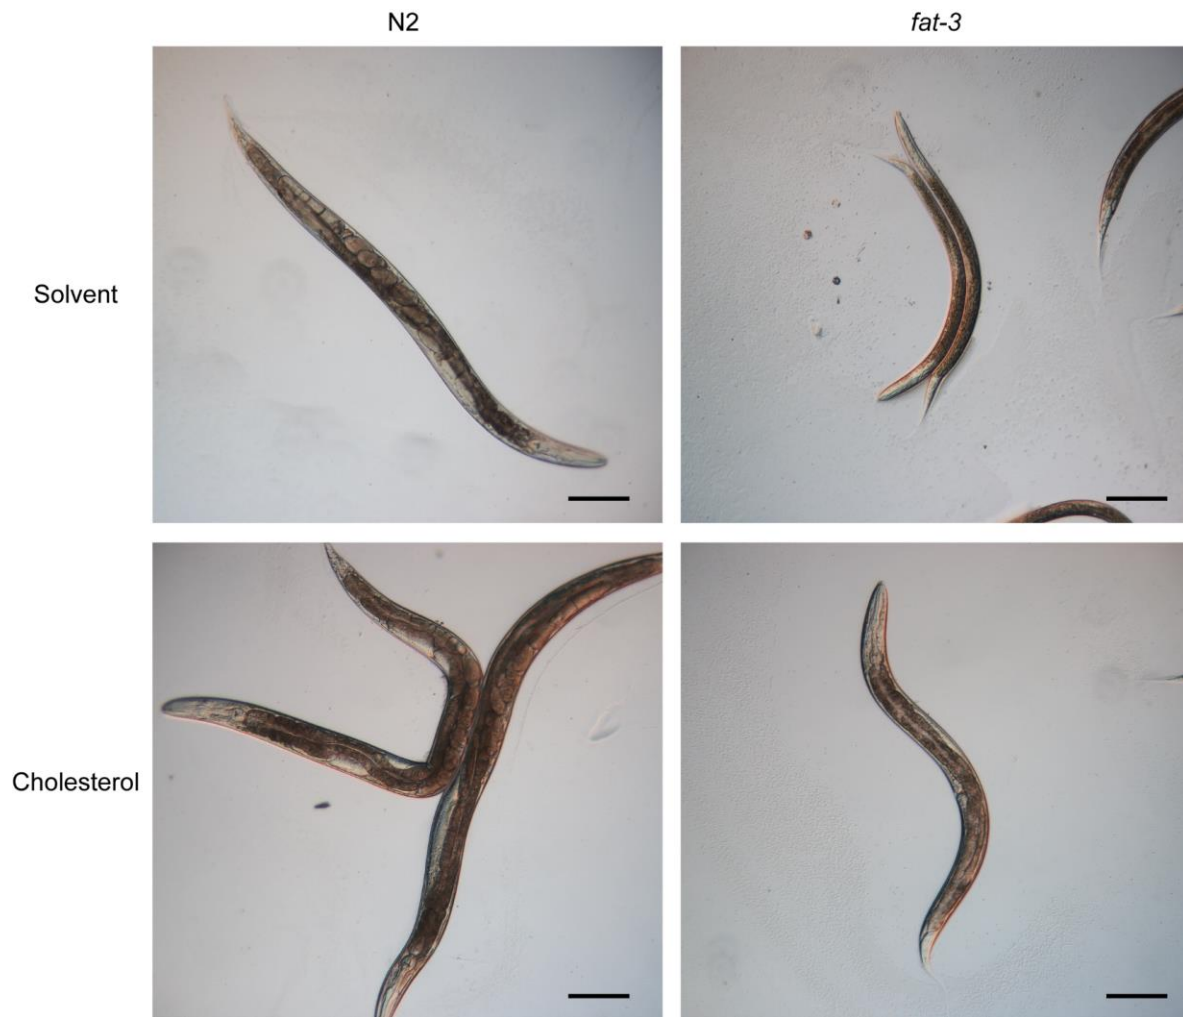

21

22 **Supplementary Figure 1. Sterol-depletion leads to dauer-like morphology in *fat-3* mutants.**  
23 N2 worms grown in cholesterol-depleted media reach adulthood (upper left panel), while *fat-3*  
24 worms mostly arrest as dauer-like animals (upper right panel). Both strains exclusively form adults  
25 in the presence of cholesterol (lower panels). Representative images from at least three  
26 experiments. Nomarski microscopy. Scale bars, 0.1 mm.

27

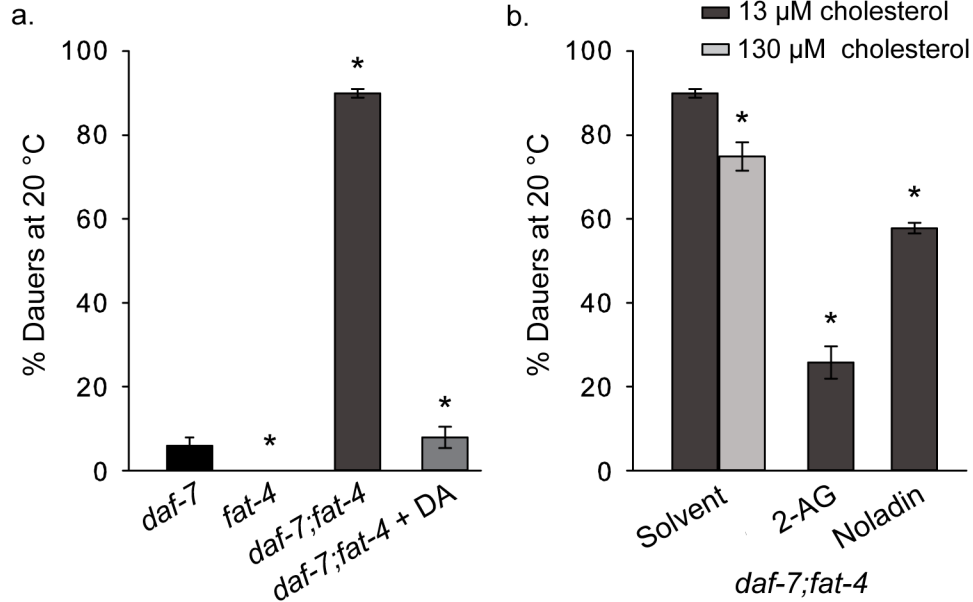

28

29

30 **Supplementary Figure 2. Arachidonic acid-deficient mutants *daf-7;fat-4* exhibit a Daf-c**  
 31 **phenotype at 20 °C, which can be overcome by endocannabinoid supplementation. (a)** As  
 32 opposed to *daf-7* and *fat-4* strains, double mutant *daf-7;fat-4* forms ~85% dauers at 20 °C, and  
 33 addition of DA suppresses dauer formation almost completely. One-way analysis of variance,  
 34  $p < 0.001$ . (\*) indicates statistically significant difference with *daf-7*, multiple comparison by Holm-  
 35 Sidak method,  $p < 0.05$  for all conditions. Bars represent mean values and error bars represent  
 36 standard errors. The number of independent experiments is  $n = 3$  for all conditions. [DA] = 90 nM.  
 37 **(b)** Addition of excess cholesterol, 2-AG and noladin effectively reduces dauer formation in each  
 38 case. One-way analysis of variance  $p < 0.001$ . (\*) indicates statistically significant difference with  
 39 cholesterol 13 μM, multiple comparison by Holm-Sidak method,  $p < 0.05$  for cholesterol 130 μM  
 40 and  $p < 0.001$  for the remaining conditions. Bars represent mean values and error bars represent  
 41 standard errors. The number of independent experiments is  $n = 3$  for all conditions, except for 2-  
 42 AG where  $n = 9$ . [DA] = 90 nM. [2-AG] = 50 μM. [Noladin] = 100 μM.

43

44

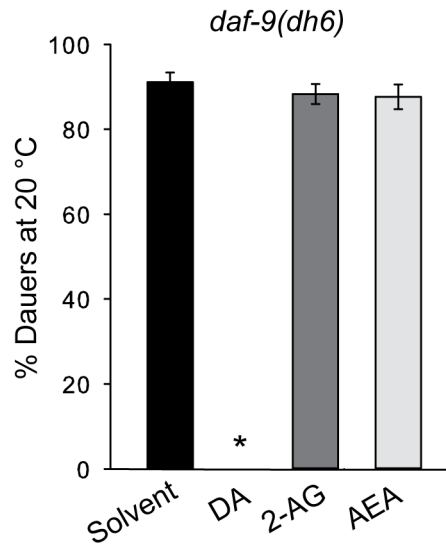

45

46 **Supplementary Figure 3. Endocannabinoids cannot substitute for dafachronic acid.** *daf-*  
 47 *9(dh6)* mutant worms are unable to produce DAs, and hence form dauer larvae. Supplementing  
 48 the food with DA suppresses this arrest. However, addition of endocannabinoids 2-AG and AEA  
 49 does not suppress this phenotype. Kruskal-Wallis One Way Analysis of Variance on Ranks,  
 50  $p < 0.001$ , All Pairwise Multiple Comparison Procedures (Tukey's Method), (\*) indicates  
 51 statistically significant difference with control (solvent)  $p < 0.05$ . Bars represent mean values and  
 52 error bars represent Standard Errors. The amount of independent experiments is  $n = 6$  for all  
 53 conditions. [DA] = 90 nM. [2-AG] or [AEA] = 50  $\mu$ M.

54

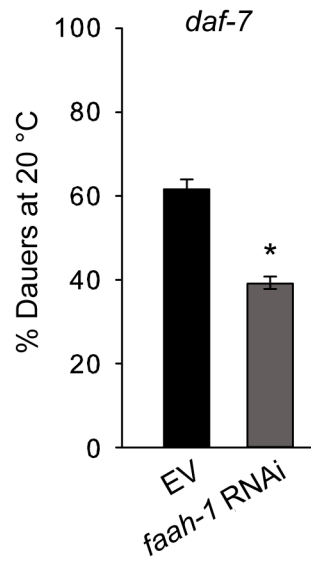

55

56

57 **Supplementary Figure 4. RNAi for *faah-1* effectively reduces the Daf-c phenotype of *daf-7***  
58 **strain at 20 °C.** t-test,  $p < 0.001$ . (\*) indicates statistically significant difference with empty vector  
59 control (EV). Bars represent mean values and error bars represent Standard Errors. The amount of  
60 independent experiments is  $n=6$  for both conditions.

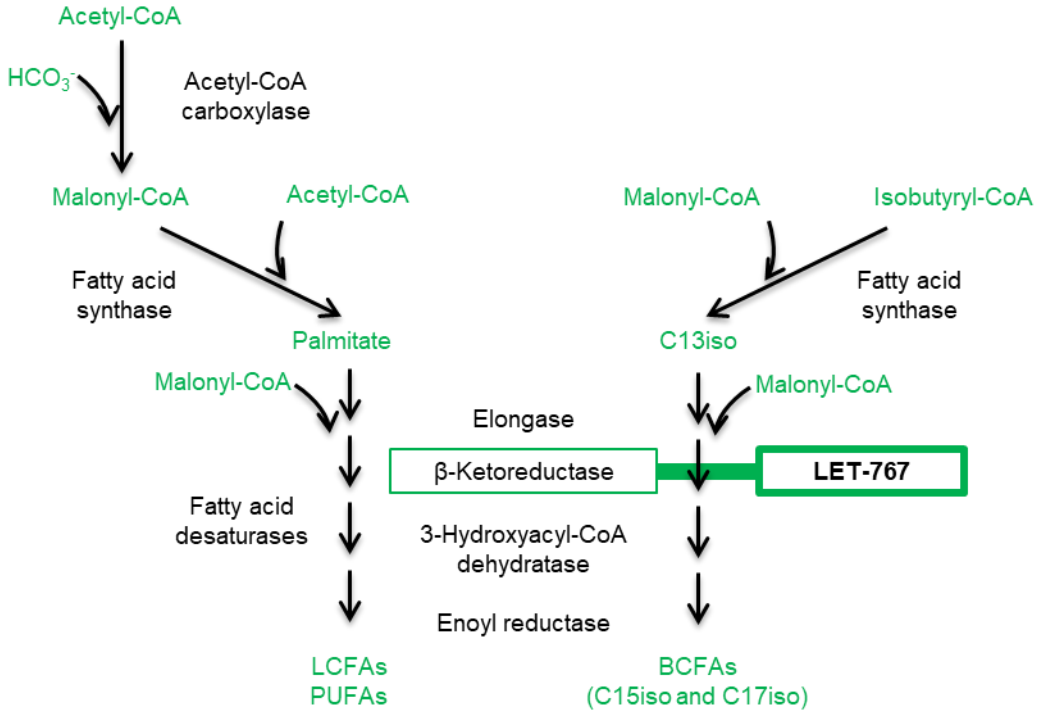

61

62 **Supplementary Figure 5. Fatty acid synthesis and elongation in *C. elegans*.** *C. elegans* is  
 63 capable of synthesizing long-chain fatty acids from either acetyl-CoA precursors or dietary  
 64 palmitate. Acetyl-CoA is condensed with  $\text{HCO}_3^-$  to generate malonyl-CoA by the acetyl-CoA  
 65 carboxylase enzyme. Malonyl-CoA consecutively incorporates two carbon units for its elongation  
 66 up to palmitate by the enzyme fatty acid synthase. Several elongases, LET-767 3-ketoacyl-CoA-  
 67 reductase, 3-hydroxyacyl-CoA dehydratase and enoyl reductase activities and seven desaturases  
 68 (FAT-1 through FAT-7) are necessary for LCFA remodeling and PUFA synthesis. The synthesis  
 69 from Isobutyryl-CoA to C13iso is also performed by fatty acid synthase enzyme. Then, C13iso is  
 70 further elongated to longer BCFAs (C15iso and C17iso) by the action of elongase enzymes ELO-  
 71 5/6 and LET-767. The point of action of LET-767, the RNAi-targeted enzyme evaluated in this  
 72 study, is indicated and highlighted with a green box.

73

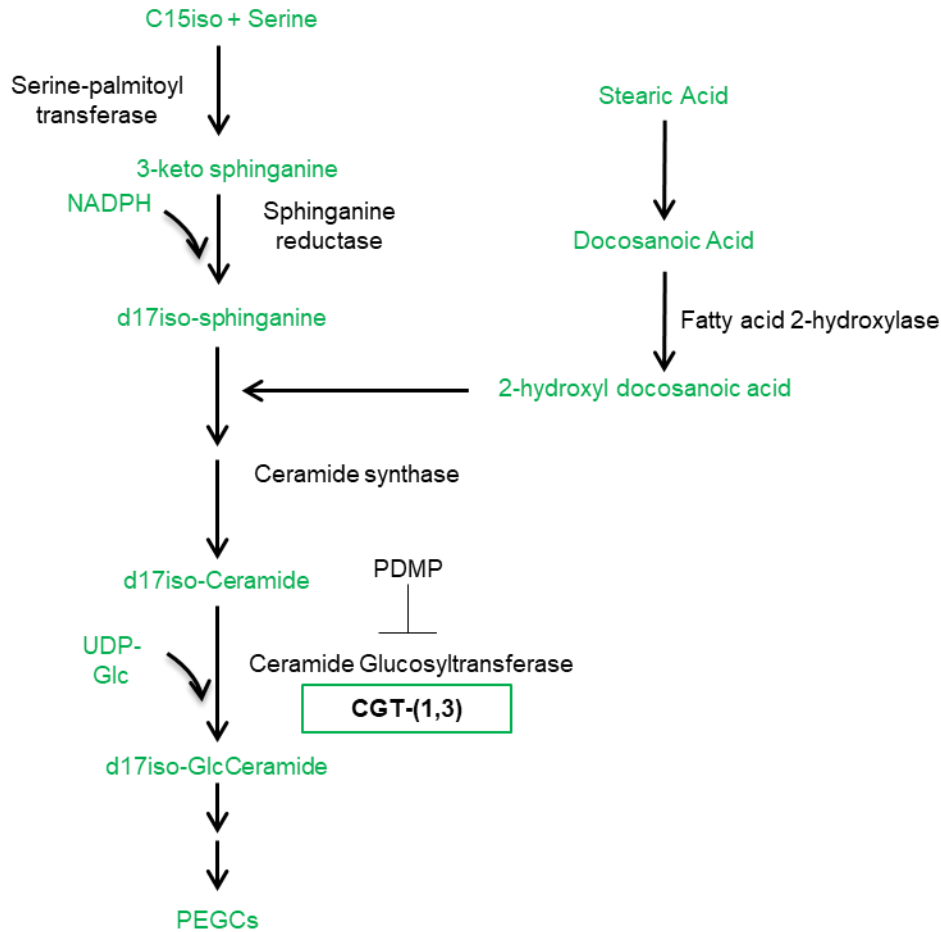

74

75

76 **Supplementary Figure 6. Simplified biosynthesis pathway for d17iso-GlcCeramide from**  
 77 **branched-chain fatty acid precursors in *C. elegans*.** The enzymes involved in this pathway are  
 78 depicted in a simplified scheme. Ceramide glucosyltransferase enzymes (CGT-1,3) are highlighted  
 79 with a green box and the point of action of PDMP is indicated. Not shown are the enzymatic steps  
 80 for the conversion of d17iso-sphinganine to d17iso-ceramide.

81

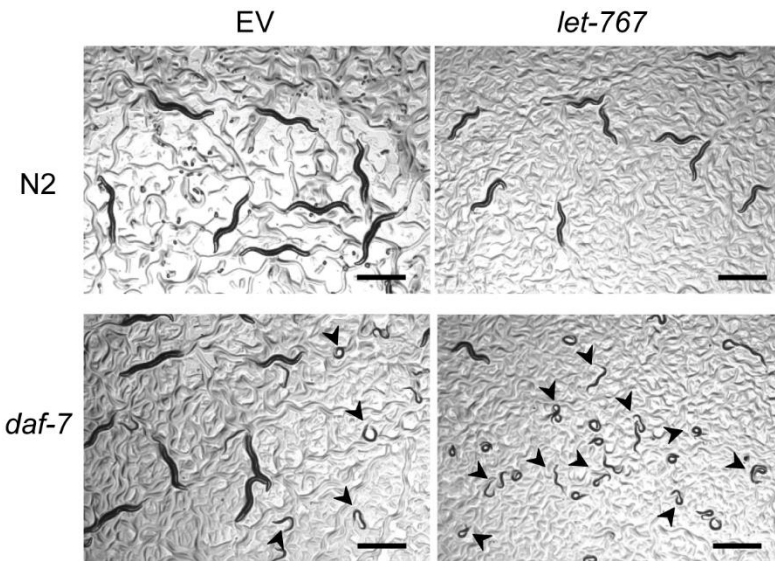

82

83 **Supplementary Figure 7. Deficiency of iso-branched fatty acids leads to a high incidence of**  
84 **dauers in *daf-7* background mutants.** *let-767* RNAi treated wild-type worms do not display a  
85 dauer formation phenotype. However, *daf-7* worms treated with *let-767* RNAi exhibit a strong  
86 dauer phenotype (indicated with arrowheads), in contrast to *daf-7* animals treated with an empty  
87 vector control. Representative images from at least three experiments. Scale bars, 0.5 mm.

88



89 **Supplementary Table 1. LC-MS/MS detection and absolute quantification of 2-AG and AEA**  
90 **in lipid extracts of N2, *daf-7*, *fat-3* and *daf-7;fat-3* worms supplemented with methyl-AA (50**  
91  **$\mu$ M). *fat-3* and *daf-7;fat-3* mutants are capable of synthesizing 2-AG and AEA from the**  
92 **methyl-AA supplement.**

|                                | 2-AG (pg/mg protein) | AEA (pg/mg protein) |
|--------------------------------|----------------------|---------------------|
| N2                             | 853.62 $\pm$ 294.00  | 19.74 $\pm$ 11.28   |
| <i>daf-7</i>                   | 1654.63 $\pm$ 745.22 | 17.93 $\pm$ 9.62    |
| <i>fat-3</i> + methyl-AA       | 964.58               | 8027.85             |
| <i>daf-7;fat-3</i> + methyl-AA | 1210.5               | 10226.7             |

93

94

95 **Supplementary Table 2. LC-MS/MS detection and absolute quantification of 2-AG in lipid**  
96 **extracts of synchronized N2 L4 worms grown for 72h at 20 °C in the presence of cholesterol**  
97 **at the standard working concentration (13 μM) and under complete depletion of this sterol**  
98 **(0 μM).**

| [cholesterol] | [2-AG]                              |
|---------------|-------------------------------------|
| 13 μM         | 2294.025±177.92 (pg/mg protein)     |
| 0 μM          | 4868.33± 438.08 (pg/mg protein) (*) |

99

100 Measurements are informed as (mean values ± standard deviations). (\*) indicates statistically  
101 significant difference with [cholesterol]=13 μM condition. t-test, p-value=0.002. The amount of  
102 independent experiments is n=3 for [cholesterol]=13 μM and n=2 for [cholesterol]= 0 μM.

103

104

105

106

107

108

109

110 **Supplementary Table 3. *let-767* RNAi significantly decreases the mmBCFA content (15:0iso**  
 111 **and 17:0iso) of *daf-7*.**

| FATTY ACID | Empty vector | <i>let-767</i> RNAi | p-value |
|------------|--------------|---------------------|---------|
| 14:0       | 2.28 ± 0.41  | 2.73 ± 0.41         | 0.246   |
| 15:0iso    | 6.83 ± 0.20  | 3.43 ± 0.27*        | <0.001  |
| 15:0       | 0.08 ± 0.03  | 0.22 ± 0.1          | 0.074   |
| 16:0       | 4.30 ± 0.97  | 6.52 ± 2.49         | 0.224   |
| 17:0iso    | 4.38 ± 0.11  | 2.15 ± 0.37*        | <0.001  |
| 18:0       | 5.19 ± 0.52  | 7.38 ± 0.33*        | 0.004   |
| 18:1 (n-9) | 7.32 ± 1.19  | 3.41 ± 0.16*        | 0.005   |
| 18:1 (n-7) | 19.22 ± 3.20 | 20.77 ± 3.29*       | 0.045   |
| 20:3 (n-6) | 1.88 ± 0.24  | 1.99 ± 0.18         | 0.564   |
| 20:4 (n-6) | 1.31 ± 0.40  | 1.10 ± 0.06         | 0.414   |
| 20:3 (n-3) | 0.22 ± 0.08  | 0.10 ± 0.02         | 0.070   |
| 20:4 (n-3) | 1.81 ± 0.14  | 2.18 ± 0.56         | 0.308   |
| 20:5 (n-3) | 6.32 ± 1.21  | 6.79 ± 1.23         | 0.657   |

112

113 Relative percentage values (mean ± standard deviation) of fatty acids measured by GC/MS  
 114 analysis of *daf-7* worms grown on control conditions (empty vector) or *let-767* RNAi. (\*) indicates  
 115 significant difference with empty vector. t-test,  $\alpha=0.05$ . The amount of independent experiments  
 116 is n=3 for empty vector and *let-767* RNAi.

117

118 **Supplementary Table 4. GC/MS analysis of fatty acid methyl-esters in *daf-7* mutants grown**  
 119 **on empty vector or *let-767* RNAi in the absence or presence of 2-AG.**

|               | EV           | <i>let-767</i> RNAi | <i>let-767</i> RNAi+2-AG |
|---------------|--------------|---------------------|--------------------------|
| SFA           | 13.42 ± 1.42 | 19.55 ± 2.74 (*)    | 17.95 ± 1.27             |
| mmBCFA        | 12.55 ± 1.28 | 7.66 ± 1.73 (*)     | 6.92 ± 1.36              |
| MUFA          | 34.88 ± 3.88 | 36.54 ± 4.36        | 34.28 ± 8.37             |
| PUFA          | 23.42 ± 1.23 | 22.79 ± 1.69        | 25.68 ± 3.59             |
| Cyclopropanes | 15.74 ± 4.87 | 13.45 ± 3.30        | 15.18 ± 4.87             |

120

121 Endocannabinoid treatment does not revert the drop in mmBCFAs levels induced by *let-767*  
 122 RNAi. The values represent the relative percentage of each fatty acid species (mean ± standard  
 123 deviation). The number of independent experiments is n=3 for empty vector (EV) and *let-767*  
 124 RNAi, and of n=2 for *let-767* RNAi+2-AG. SFA: straight chain saturated fatty acids; mmBCFA:  
 125 mono-methyl branched chain fatty acids; MUFA: mono-unsaturated fatty acids; PUFA:  
 126 polyunsaturated fatty acids. (\*) indicates statistically significant difference with empty vector  
 127 control. One-way analysis of variance, p<0.05. [2-AG]=50 μM.

128

129
